# Supplementary material for: Efficacy and safety of a herbal medicinal product containing myrrh, chamomile and coffee charcoal for the treatment of gastrointestinal disorders: a non-interventional study
Source: PubMed Central journal article supplement — BMJ Open Gastroenterol. 2015 Feb 6;1(1):e000015. doi: 10.1136/bmjgast-2014-000015 (PMC4533328; doi:10.1136/bmjgast-2014-000015), 2015-02-06
Supplement: bmjgast-2014-000015supp_tables.pdf [file bmjgast-2014-000015supp_tables.pdf]

**Table 1:** Most common preparations used in the add-on treatment group

| Substance or drug product                                          | Patients, N (%)   |
|--------------------------------------------------------------------|-------------------|
| <b>AID group</b>                                                   | <b>173 (49.2)</b> |
| Metoclopramide                                                     | 47 (13.2)         |
| Loperamide                                                         | 14 (3.8)          |
| Iberogast® (herbal)                                                | 13 (3.7)          |
| Gastriselect® (homeopathic)                                        | 13 (3.7)          |
| Elotrans®                                                          | 12 (3.4)          |
| Butylscopolamine (+/- paracetamol)                                 | 10 (2.8)          |
| Perenterol® (antibiotic-resistant <i>Saccharomyces boulardii</i> ) | 9 (2.5)           |
| Healing earth                                                      | 6 (1.7)           |
| Symbiolact® (probiotics)                                           | 4 (1.2)           |
| Arsenicum album (homeopathic)                                      | 3 (0.8)           |
| Pantoprazole                                                       | 3 (0.8)           |
| ProBio Cult (probiotics)                                           | 3 (0.8)           |
| Dimenhydrinat                                                      | 2 (0.6)           |
| Pro Symbioflor ( <i>E.coli</i> , <i>E. faecalis</i> )              | 2 (0.6)           |
| Albumin tannate                                                    | 2 (0.6)           |
| Nux vomica (homeopathic)                                           | 2 (0.6)           |
| Mutaflor® ( <i>E. coli</i> Nissle 1917)                            | 2 (0.6)           |
| Symbioflor 2 ( <i>E. coli</i> )                                    | 2 (0.6)           |
| Simeticon                                                          | 2 (0.6)           |
| Other (N=1)                                                        | 22 (6.6)          |
| <b>IBD group</b>                                                   | <b>56 (16.2)</b>  |
| Mesalazine                                                         | 9 (2.5)           |
| Mutaflor® ( <i>E. coli</i> Nissle 1917)                            | 9 (2.5)           |
| Prednisolone                                                       | 6 (1.7)           |
| Loperamide                                                         | 3 (0.8)           |
| Azathioprine                                                       | 2 (0.6)           |
| Symbioflor 1 ( <i>Streptococcus faecalis</i> )                     | 2 (0.6)           |
| Budesonide                                                         | 2 (0.6)           |
| Probiotik pur (probiotics)                                         | 2 (0.6)           |
| Healing earth                                                      | 2 (0.6)           |
| Other (N=1)                                                        | 19 (5.7)          |
| <b>IBS group</b>                                                   | <b>127 (35.8)</b> |
| Butylscopolamine (+/- paracetamol)                                 | 27 (7.5)          |
| Loperamide                                                         | 12 (3.4)          |
| Symbiolact® (probiotics)                                           | 10 (2.8)          |
| Symbioflor 1 ( <i>Streptococcus faecalis</i> )                     | 8 (2.2)           |
| Pro Symbioflor ( <i>E.coli</i> , <i>E. faecalis</i> )              | 7 (1.9)           |
| Histaminum hydrochloricum (homeopathic)                            | 7 (1.9)           |
| Probiotik pur (probiotics)                                         | 7 (1.9)           |

|                                         |          |
|-----------------------------------------|----------|
| Symbioflor 2 ( <i>E. coli</i> )         | 5 (1.4)  |
| Mutaflor® ( <i>E. coli</i> Nissle 1917) | 4 (1.2)  |
| Candida albicans (homeopathic)          | 3 (0.8)  |
| Hepeel® (homeopathic)                   | 3 (0.8)  |
| Colibiogen® ( <i>E. coli</i> )          | 3 (0.8)  |
| BactoFlor 10/20 (probiotics)            | 3 (0.8)  |
| Iberogast® (herbal)                     | 2 (0.6)  |
| Toxaprevent® (Klinoptilolith)           | 2 (0.6)  |
| Other (N=1)                             | 24 (7.2) |

**Table 2:** Most common preparations used as other therapy

| Substance or drug product                                          | Patients, N (%)   |
|--------------------------------------------------------------------|-------------------|
| <b><i>AID group</i></b>                                            | <b>152 (74.9)</b> |
| Loperamide                                                         | 30 (14.8)         |
| Perenterol® (antibiotic-resistant <i>Saccharomyces boulardii</i> ) | 29 (14.3)         |
| Cocculus (homeopathic)                                             | 22 (10.8)         |
| Albumin tannate                                                    | 9 (4.4)           |
| Hamadin® (dry <i>Saccharomyces cerevisiae</i> )                    | 8 (3.9)           |
| Nux vomica (homeopathic)                                           | 8 (3.9)           |
| Colocynthis (homeopathic)                                          | 7 (3.4)           |
| Metoclopramide                                                     | 7 (3.4)           |
| Pantoprazole                                                       | 6 (3.0)           |
| Iberogast® (herbal)                                                | 5 (2.5)           |
| Ciprofloxacin                                                      | 3 (1.5)           |
| Activated charcoal                                                 | 2 (1.0)           |
| Uzara® (herbal)                                                    | 2 (1.0)           |
| Mutaflor® ( <i>E. coli</i> Nissle 1917)                            | 2 (1.0)           |
| Butylscopolamine (+/- paracetamol)                                 | 2 (1.0)           |
| Other (N=1)                                                        | 10 (5.0)          |
| <b><i>IBD group</i></b>                                            | <b>5 (2.5)</b>    |
| Mesalazine                                                         | 4 (2.0)           |
| Dexamethasone                                                      | 1 (0.5)           |
| <b><i>IBS group</i></b>                                            | <b>46 (22.7)</b>  |
| Loperamide                                                         | 11 (5.4)          |
| Mebeverine                                                         | 11 (5.4)          |
| Domperidone                                                        | 8 (3.9)           |
| Metoclopramide                                                     | 5 (2.5)           |
| Butylscopolamine (+/- paracetamol)                                 | 5 (2.5)           |
| Other (N=1)                                                        | 6 (3.0)           |
